# Supplementary material
Source: PubMed Central journal article supplement (PMC2705590)
Supplement: 0904104106_ST7_PDF.pdf [file 0904104106_ST7_PDF.pdf]

Table S7. Numerical values of dot blot signals

| SpoVK                     | CotSA   | YrbC  | SpoVE | Soj     | SpoIIIE | SigF    | SpoIIAB | Spo0A(TrcR) | SigA  |      |
|---------------------------|---------|-------|-------|---------|---------|---------|---------|-------------|-------|------|
| Set 1                     |         |       |       |         |         |         |         |             |       |      |
| 1d                        | 1234    | 714   | 1405  | 1103    | 908     | 1315    | 732     | 1044        | 1302  | 5698 |
| 3d                        | 1677    | 813   | 861   | 878     | 1234    | 1008    | 411     | 983         | 974   | 1983 |
| 5d                        | 9432    | 9126  | 10023 | 9553    | 2251    | 3984    | 654     | 1706        | 8905  | 1309 |
| 7d                        | 19821   | 14271 | 20017 | 20127   | 8093    | 7139    | 2037    | 1938        | 18337 | 890  |
| Set 2                     |         |       |       |         |         |         |         |             |       |      |
| 1d                        | 1098    | 615   | 1233  | 993     | 789     | 1578    | 689     | 977         | 1173  | 6605 |
| 3d                        | 1541    | 798   | 792   | 803     | 1402    | 1239    | 321     | 912         | 862   | 2474 |
| 5d                        | 8790    | 8773  | 9510  | 8902    | 2009    | 4037    | 614     | 1611        | 8001  | 1721 |
| 7d                        | 16889   | 13043 | 18121 | 17977   | 9124    | 7802    | 1799    | 1745        | 17002 | 756  |
| Set 3                     |         |       |       |         |         |         |         |             |       |      |
| 1d                        | 1363    | 810   | 1601  | 1187    | 974     | 1147    | 823     | 1100        | 1527  | 5004 |
| 3d                        | 1805    | 867   | 917   | 1014    | 1307    | 980     | 465     | 1004        | 1108  | 1879 |
| 5d                        | 10017   | 1033  | 11053 | 10765   | 2511    | 3315    | 711     | 1892        | 9403  | 2043 |
| 7d                        | 21680   | 15302 | 21976 | 22331   | 8672    | 6984    | 2199    | 2076        | 19319 | 1007 |
| Calculated average values |         |       |       |         |         |         |         |             |       |      |
| 1d                        | 1231.67 | 713   | 1413  | 1094.33 | 890.33  | 1346.67 | 748     | 1040.33     | 1334  | 5769 |

|                   |             |             |             |         |         |         |             |         |             |        |
|-------------------|-------------|-------------|-------------|---------|---------|---------|-------------|---------|-------------|--------|
| 3d                | 1674.33     | 826         | 856.67      | 898.33  | 1314.33 | 1075.67 | 399         | 966.33  | 981.3333333 | 2112   |
| 5d                | 9413        | 6310.67     | 10195.33333 | 9740    | 2257    | 3778.67 | 659.67      | 1736.33 | 8769.666667 | 1691   |
| 7d                | 19463.33333 | 14205.33333 | 20038       | 20145   | 8629.67 | 7308.33 | 2011.666667 | 1919.67 | 18219.33333 | 884.33 |
| Calculated errors |             |             |             |         |         |         |             |         |             |        |
| 1d                | 132.52      | 97.50       | 184.13      | 97.29   | 93.76   | 217.24  | 68.42       | 61.58   | 179.16      | 802.86 |
| 3d                | 132.02      | 36.29       | 62.61       | 106.96  | 84.24   | 142.14  | 72.75       | 48.21   | 123.16      | 317.78 |
| 5d                | 613.72      | 4574.000036 | 785.80      | 945.47  | 251.05  | 402.42  | 48.75       | 142.93  | 710.73      | 367.92 |
| 7d                | 2415.44     | 1130.93     | 1927.59     | 2177.06 | 516.80  | 434.50  | 201.20      | 166.26  | 1162.97     | 125.60 |
